# Supplementary material for: Autonomy support in telehealth: an evolutionary concept analysis
Source: Frontiers journal article supplement (doi:10.3389/fpubh.2025.1544840), 2025-03-14
Supplement: Data_Sheet_1.pdf [file Data_Sheet_1.pdf]

## *Supplementary Material*

### **1 Supplementary Table 1. Search strategies (taking PubMed as the example)**

| <b>Search strategies:</b> |                                                                                                                                                                                                                                                                                                                                                                                                                                                                                                                                                                                                                                                                                                                                                                                                                                                                                                                                                                                                                                                                                                                                                                                                                                                                                                                 |
|---------------------------|-----------------------------------------------------------------------------------------------------------------------------------------------------------------------------------------------------------------------------------------------------------------------------------------------------------------------------------------------------------------------------------------------------------------------------------------------------------------------------------------------------------------------------------------------------------------------------------------------------------------------------------------------------------------------------------------------------------------------------------------------------------------------------------------------------------------------------------------------------------------------------------------------------------------------------------------------------------------------------------------------------------------------------------------------------------------------------------------------------------------------------------------------------------------------------------------------------------------------------------------------------------------------------------------------------------------|
| #1                        | “autonomy support*” [Title/Abstract] OR “autonomy promotion” [Title/Abstract] OR “autonomous support*” [Title/Abstract] OR “support for autonomy” [Title/Abstract] OR “support autonomy” [Title/Abstract] OR “respect for autonomy” [Title/Abstract] OR “respect autonomy” [Title/Abstract] OR “autonomy enhancing” [Title/Abstract] OR                                                                                                                                                                                                                                                                                                                                                                                                                                                                                                                                                                                                                                                                                                                                                                                                                                                                                                                                                                         |
| #2                        | “Telemedicine” [MeSH Terms] OR “Mobile Health” [Title/Abstract] OR “mHealth” [Title/Abstract] OR “Telehealth” [Title/Abstract] OR “eHealth” [Title/Abstract]                                                                                                                                                                                                                                                                                                                                                                                                                                                                                                                                                                                                                                                                                                                                                                                                                                                                                                                                                                                                                                                                                                                                                    |
| #3                        | “Remote Consultation” [MeSH Terms] OR “Consultation, Remote” [Title/Abstract] OR “Teleconsultation” [Title/Abstract] OR “Teleconsultations” [Title/Abstract]                                                                                                                                                                                                                                                                                                                                                                                                                                                                                                                                                                                                                                                                                                                                                                                                                                                                                                                                                                                                                                                                                                                                                    |
| #4                        | “Education, Distance” [MeSH Terms] OR “Distance Education” [Title/Abstract] OR “Distance Learning” [Title/Abstract] OR “Learning, Distance” [Title/Abstract] OR “Online Learning” [Title/Abstract] OR “Learning, Online” [Title/Abstract] OR “Online Education” [Title/Abstract] OR “Education, Online” [Title/Abstract] OR “Online Educations” [Title/Abstract] OR “Correspondence Courses” [Title/Abstract] OR “Correspondence Course” [Title/Abstract] OR “Course, Correspondence” [Title/Abstract]                                                                                                                                                                                                                                                                                                                                                                                                                                                                                                                                                                                                                                                                                                                                                                                                          |
| #5                        | “Telenursing” [MeSH Terms]                                                                                                                                                                                                                                                                                                                                                                                                                                                                                                                                                                                                                                                                                                                                                                                                                                                                                                                                                                                                                                                                                                                                                                                                                                                                                      |
| #6                        | “Telephone” [MeSH Terms] OR “Telephones” [Title/Abstract] OR “Switchboard Service” [Title/Abstract] OR “Service, Switchboard” [Title/Abstract] OR “Services, Switchboard” [Title/Abstract] OR “Switchboard Services” [Title/Abstract]                                                                                                                                                                                                                                                                                                                                                                                                                                                                                                                                                                                                                                                                                                                                                                                                                                                                                                                                                                                                                                                                           |
| #7                        | “Cell Phone” [MeSH Terms] OR “Phone, Cell” [Title/Abstract] OR “Phones, Cell” [Title/Abstract] OR “Cellular Phone” [Title/Abstract] OR “Cellular Phones” [Title/Abstract] OR “Phone, Cellular” [Title/Abstract] OR “Phones, Cellular” [Title/Abstract] OR “Telephone, Cellular” [Title/Abstract] OR “Cellular Telephone” [Title/Abstract] OR “Cellular Telephones” [Title/Abstract] OR “Telephones, Cellular” [Title/Abstract] OR “Cell Phones” [Title/Abstract] OR “Portable Cellular Phone” [Title/Abstract] OR “Cellular Phone, Portable” [Title/Abstract] OR “Cellular Phones, Portable” [Title/Abstract] OR “Portable Cellular Phones” [Title/Abstract] OR “Transportable Cellular Phone” [Title/Abstract] OR “Cellular Phone, Transportable” [Title/Abstract] OR “Cellular Phones, Transportable” [Title/Abstract] OR “Transportable Cellular Phones” [Title/Abstract] OR “Mobile Phone” [Title/Abstract] OR “Mobile Phones” [Title/Abstract] OR “Phone, Mobile” [Title/Abstract] OR “Phones, Mobile” [Title/Abstract] OR “Mobile Telephone” [Title/Abstract] OR “Mobile Telephones” [Title/Abstract] OR “Telephone, Mobile” [Title/Abstract] OR “Telephones, Mobile” [Title/Abstract] OR “Car Phone” [Title/Abstract] OR “Car Phones” [Title/Abstract] OR “Phone, Car” [Title/Abstract] OR “Phones, Car” |
| #8                        | “Patient Portals” [MeSH Terms] OR “Patient Web Portal” [Title/Abstract] OR “Portal, Patient Web” [Title/Abstract] OR “Portals, Patient Web” [Title/Abstract] OR “Web Portal, Patient” [Title/Abstract] OR “Web Portals, Patient” [Title/Abstract] OR “Patient Internet Portals” [Title/Abstract] OR “Patient Internet Portals” [Title/Abstract] OR “Patient Internet Portals” [Title/Abstract] OR “Internet Portal, Patient”                                                                                                                                                                                                                                                                                                                                                                                                                                                                                                                                                                                                                                                                                                                                                                                                                                                                                    |

- [Title/Abstract] OR “Internet Portal, Patient” [Title/Abstract] OR “Internet Portals, Patient” [Title/Abstract] OR “Patient Internet Portal” [Title/Abstract] OR “Portal, Patient Internet” [Title/Abstract] OR “Portals, Patient Internet” [Title/Abstract] OR “Patient Web Portals” [Title/Abstract] OR “Patient Portal” [Title/Abstract] OR “Portal, Patient” [Title/Abstract]
- #9 “Electronic Mail” [MeSH Terms] OR “Mail, Electronic” [Title/Abstract] OR “Email” [Title/Abstract] OR “Emails” [Title/Abstract] OR “E-Mail” [Title/Abstract] OR “E Mail” [Title/Abstract] OR “E-Mails” [Title/Abstract]
- #10 “Television” [MeSH Terms] OR “Televisions” [Title/Abstract]
- #11 “wechat” [Title/Abstract] OR “qq” [Title/Abstract] OR “QQ” [Title/Abstract] OR “YouTube” [Title/Abstract] OR “tiktok” [Title/Abstract]
- #12 #2 OR #3 OR #4 OR #5 OR #6 OR #7 OR #8 OR #9 OR #10 OR #11
- #13 #1 AND #12

## 2 Supplementary Table 2. The sources and distribution of the attributes of autonomy support in telehealth.

| References                             | Attributes         |               |        |           |         |               |           |
|----------------------------------------|--------------------|---------------|--------|-----------|---------|---------------|-----------|
|                                        | Technical feedback | Virtual agent | Choice | Rationale | Empathy | Collaboration | Strengths |
| Janssen & Schadenberg, 2024(1)         | √                  | √             | √      | √         |         | √             |           |
| Trzebiński et al., 2023(2)             | √                  | √             | √      | √         | √       |               |           |
| Li et al., 2023(3)                     | √                  |               | √      | √         | √       | √             | √         |
| Kirkpatrick & Lawrie, 2023(4)          | √                  |               | √      | √         | √       | √             |           |
| Kim et al., 2023(5)                    | √                  |               | √      | √         | √       | √             | √         |
| Cox et al., 2023(6)                    | √                  |               | √      | √         |         | √             |           |
| van Strien-Knippenberg et al., 2022(7) | √                  |               | √      | √         |         | √             |           |
| Legate & Weinstein, 2022) (8)          |                    |               | √      | √         |         |               |           |
| Pettersson et al., 2021(9)             | √                  |               | √      | √         |         |               | √         |
| Formosa, 2021(10)                      | √                  | √             | √      | √         |         |               |           |
| Altendorf et al., 2021(11)             | √                  |               | √      | √         |         |               |           |

|                            |   |   |   |   |   |   |   |
|----------------------------|---|---|---|---|---|---|---|
| Smit & Bol, 2020(12)       |   |   |   | √ |   |   |   |
| Pirhonen et al., 2020(13)  | √ | √ | √ | √ |   |   | √ |
| Gültzow et al., 2020(14)   | √ |   | √ | √ |   | √ |   |
| Bradshaw et al., 2020(15)  | √ |   | √ | √ |   |   |   |
| Altendorf et al., 2020(16) | √ |   | √ | √ |   | √ |   |
| Smit et al., 2019(17)      | √ |   | √ | √ |   | √ |   |
| Lievense et al., 2019(18)  | √ |   | √ | √ | √ |   |   |
| Altendorf et al., 2019(19) | √ |   | √ | √ | √ | √ |   |
| Johnsen et al., 2018(20)   |   |   |   | √ |   |   | √ |
| Kim & Kim, 2017(21)        | √ |   | √ | √ | √ | √ | √ |
| Kinnafick et al., 2016(22) | √ |   | √ | √ |   | √ |   |
| Bång & Ragnemalm, 2012(23) |   |   | √ | √ |   |   |   |
| Resnicow et al., 2008(24)  |   |   | √ | √ | √ | √ | √ |
| Williams et al., 2007(25)  | √ |   | √ | √ |   | √ | √ |

### 3 Supplementary Table 3. The benefits and challenges brought by autonomy support in telehealth.

| References                     | Benefits                                                                                           | Challenges                                                                                                       |
|--------------------------------|----------------------------------------------------------------------------------------------------|------------------------------------------------------------------------------------------------------------------|
| Janssen & Schadenberg, 2024(1) | Enhanced patients' sense of freedom and internal motivation for behavior change.                   | The norms and beliefs that guide the development of social robots will have an impact on the patient experience. |
| Trzebiński et al., 2023(2)     | Enhanced the level of patients' perception of autonomy support and their intentions for behavioral | 1. The expert endorsement failed to have a positive impact on the patient.<br>2. The emotions displayed by the   |

|                                        |                                                                                                 |                                                                                                                                                 |
|----------------------------------------|-------------------------------------------------------------------------------------------------|-------------------------------------------------------------------------------------------------------------------------------------------------|
|                                        | change.                                                                                         | chatbot might undermine the patient's autonomy.                                                                                                 |
| Li et al., 2023(3)                     | Improved the patients' self-management ability, anxiety and depression, and quality of life.    | It is necessary to provide training and education on smartphone applications and related knowledge to patients.                                 |
| Kirkpatrick & Lawrie, 2023(4)          | Enhanced patients' receptivity to health information.                                           | The use of self-supportive language (such as "can", "might", "probably") is not sufficient to change attitudes and intentions towards behavior. |
| Kim et al., 2023(5)                    | Enhanced the patients' perseverance.                                                            | The development of information technology equipment requires a high cost.                                                                       |
| Cox et al., 2023(6)                    | Enhanced the level of patients' autonomy support.                                               | After the intervention, the patient experienced a sense of loss.                                                                                |
| van Strien-Knippenberg et al., 2022(7) | 1. Enhanced the effectiveness of health information.<br>2. Reduced cost-effectiveness.          | The intervention is highly effective for patients with high needs for autonomy, while it is only moderately effective for those with low needs. |
| Legate & Weinstein, 2022(8)            | Promoted the motivation for individual behavioral change.                                       | Highlighting the significance and urgency of information content is more effective than traditional self-support strategies.                    |
| Pettersson et al., 2021(9)             | Enhanced the sense of freedom, confidence and autonomy that patients experienced.               | The characteristics of autonomy support have changed in telehealth.                                                                             |
| Formosa, 2021(10)                      | Promoted the autonomy of patients.                                                              | Manipulation, deskilling and illicit surveillance will undermine patients' autonomy.                                                            |
| Altendorf et al., 2021(11)             | Enhanced the level of patients' perceived autonomy support and reduce psychological resistance. | The autonomy support language did not have any impact on the patient.                                                                           |
| Smit & Bol, 2020(12)                   | /                                                                                               | There are differences in the needs for individual autonomy.                                                                                     |
| Pirhonen et al.,                       | Reduced patients' reliance                                                                      | The differences in cultures from various regions will affect the                                                                                |

|                            |                                                                                                   |                                                                                                                                                    |
|----------------------------|---------------------------------------------------------------------------------------------------|----------------------------------------------------------------------------------------------------------------------------------------------------|
| 2020(13)                   | on professionals.                                                                                 | autonomy support provided by robots.                                                                                                               |
| Gültzow et al., 2020(14)   | Iterated the tools providing autonomy support.                                                    | The effectiveness of the tool needs to be further verified.                                                                                        |
| Bradshaw et al., 2020(15)  | Enhanced the security of information and the effectiveness of information transmission.           | Autonomy support requires information security guarantee.                                                                                          |
| Altendorf et al., 2020(16) | Enhanced the level of patients' perceived autonomy support.                                       | The autonomy support language did not have any impact on the patient.                                                                              |
| Smit et al., 2019(17)      | Enhanced self-efficacy and behavioral motivation.                                                 | /                                                                                                                                                  |
| Lievense et al., 2019(18)  | Enhanced self-efficacy and experiential sense.                                                    | It is difficult to maintain the long-term effect of behavioral changes.                                                                            |
| Altendorf et al., 2019(19) | Enhanced the intention for behavioral change.                                                     | The control information does not necessarily undermine the autonomy of patients.                                                                   |
| Johnsen et al., 2018(20)   | Promoted patients' self-care behaviors.                                                           | /                                                                                                                                                  |
| Kim & Kim, 2017(21)        | Changed bad habits.                                                                               | /                                                                                                                                                  |
| Kinnafick et al., 2016(22) | Enhanced the effectiveness of information and the cost of intervention                            | Autonomy support intervention needs to fully consider the frequency and timing of information push in relation to the suitability for individuals. |
| Bång & Ragnemalm, 2012(23) | /                                                                                                 | /                                                                                                                                                  |
| Resnicow et al., 2008(24)  | Enhanced patients' motivation for behavioral change and their satisfaction with the intervention. | Further exploration is needed to uncover the characteristics of individuals.                                                                       |
| Williams et al., 2007(25)  | Enhanced patients' self-management ability                                                        | /                                                                                                                                                  |

#### 4 References

1. Janssen S, Schadenberg BR. A Psychological Need-Fulfillment Perspective for Designing Social Robots that Support Well-Being. *International Journal of Social Robotics*. 2024;1-22.
2. Trzebiński W, Claessens T, Buhmann J, De Waele A, Hendrickx G, Van Damme P, et al. The Effects of Expressing Empathy/Autonomy Support Using a COVID-19 Vaccination Chatbot: Experimental Study in a Sample of Belgian Adults. *JMIR Form Res*. 2023;7:e41148.

3. Li Y, Yang W, Qu Y, Zhang X, Lin M, Fu L, et al. Effects of an autonomy-supportive intervention programme (ASIP) on self-care, quality of life, and mental health in heart failure patients: a randomized controlled trial. *Qual Life Res.* 2023;32(11):3039-52.
4. Kirkpatrick CE, Lawrie LL. Can Videos on TikTok Improve Pap Smear Attitudes and Intentions? Effects of Source and Autonomy Support in Short-Form Health Videos. *Health Commun.* 2023;1-13.
5. Kim S, Shin Y, Jeong Y, Na S, Han CE. Autonomy support encourages use of more-affected arm post-stroke. *J Neuroeng Rehabil.* 2023;20(1):116.
6. Cox NS, Lee JYT, McDonald CF, Mahal A, Alison JA, Wootton R, et al. Perceived Autonomy Support in Telerehabilitation by People With Chronic Respiratory Disease: A Mixed Methods Study. *Chest.* 2023;163(6):1410-24.
7. van Strien-Knippenberg IS, Altendorf MB, Hoving C, van Weert JCM, Smit ES. Message Frame-Tailoring in Digital Health Communication: Intervention Redesign and Usability Testing. *JMIR Form Res.* 2022;6(4):e33886.
8. Legate N, Weinstein N. Can We Communicate Autonomy Support and a Mandate? How Motivating Messages Relate to Motivation for Staying at Home across Time during the COVID-19 Pandemic. *Health Commun.* 2022;37(14):1842-9.
9. Pettersson B, Janols R, Wiklund M, Lundin-Olsson L, Sandlund M. Older Adults' Experiences of Behavior Change Support in a Digital Fall Prevention Exercise Program: Qualitative Study Framed by the Self-determination Theory. *J Med Internet Res.* 2021;23(7):e26235.
10. Formosa P. Robot autonomy vs. human autonomy: social robots, artificial intelligence (AI), and the nature of autonomy. *Minds and Machines.* 2021;31(4):595-616.
11. Altendorf MB, Smit ES, Azrout R, Hoving C, Weert J. A smoker's choice? Identifying the most autonomy-supportive message frame in an online computer-tailored smoking cessation intervention. *Psychol Health.* 2021;36(5):549-74.
12. Smit ES, Bol N. From self-reliant to expert-dependents: identifying classes based on health-related need for autonomy and need for external control among mobile users. *Media Psychology.* 2020;23(3):391-414.
13. Pirhonen J, Melkas H, Laitinen A, Pekkarinen S. Could robots strengthen the sense of autonomy of older people residing in assisted living facilities?—A future-oriented study. *Ethics and Information Technology.* 2020;22(2):151-62.
14. Gültzow T, Smit ES, Hudales R, Knapen V, Rademakers J, Dirksen CD, et al. An Autonomy-Supportive Online Decision Aid to Assist Smokers in Choosing Evidence-Based Cessation Assistance: Development Process and Protocol of a Randomized Controlled Trial. *JMIR Res Protoc.* 2020;9(12):e21772.
15. Bradshaw EL, Ryan RM, Noetel M, Saeri AK, Slattery P, Grundy E, et al. Information Safety Assurances Increase Intentions to Use COVID-19 Contact Tracing Applications, Regardless of Autonomy-Supportive or Controlling Message Framing. *Front Psychol.* 2020;11:591638.
16. Altendorf M, Hoving C, Van Weert JC, Smit ES. Effectiveness of Message Frame-Tailoring in a Web-Based Smoking Cessation Program: Randomized Controlled Trial. *J Med Internet Res.* 2020;22(4):e17251.

17. Smit ES, Zeidler C, Resnicow K, de Vries H. Identifying the Most Autonomy-Supportive Message Frame in Digital Health Communication: A 2x2 Between-Subjects Experiment. *J Med Internet Res*. 2019;21(10):e14074.
18. Lievense P, Vacaru VS, Liber J, Bonnet M, Sterkenburg PS. "Stop bullying now!" Investigating the effectiveness of a serious game for teachers in promoting autonomy-supporting strategies for disabled adults: A randomized controlled trial. *Disabil Health J*. 2019;12(2):310-7.
19. Altendorf MB, van Weert JCM, Hoving C, Smit ES. Should or could? Testing the use of autonomy-supportive language and the provision of choice in online computer-tailored alcohol reduction communication. *Digit Health*. 2019;5:2055207619832767.
20. Johnsen H, Blom KF, Lee A, Nørgaard B. Using eHealth to Increase Autonomy Supportive Care: A Multicenter Intervention Study in Antenatal Care. *Comput Inform Nurs*. 2018;36(2):77-83.
21. Kim HR, Kim HS. Autonomy-supportive, Web-based lifestyle modification for cardiometabolic risk in postmenopausal women: Randomized trial. *Nurs Health Sci*. 2017;19(4):509-17.
22. Kinnafick FE, Thøgersen-Ntoumani C, Duda J. The effect of need supportive text messages on motivation and physical activity behaviour. *J Behav Med*. 2016;39(4):574-86.
23. Bång M, Ragnemalm EL, editors. *Persuasive Technology. Design for Health and Safety. Lecture Notes in Computer Science*; 2012.
24. Resnicow K, Davis RE, Zhang G, Konkel J, Strecher VJ, Shaikh AR, et al. Tailoring a fruit and vegetable intervention on novel motivational constructs: results of a randomized study. *Ann Behav Med*. 2008;35(2):159-69.
25. Williams GC, Lynch M, Glasgow RE. Computer-assisted intervention improves patient-centered diabetes care by increasing autonomy support. *Health Psychol*. 2007;26(6):728-34.
